CORRECTION

# Correction: The Unique Dorsal Brood Pouch of Thermosbaenacea (Crustacea, Malacostraca) and Description of an Advanced Developmental Stage of *Tulumella unidens* from the Yucatan Peninsula (Mexico), with a Discussion of Mouth Part Homologies to Other Malacostraca

The PLOS ONE Staff

## Notice of Republication

This article was republished on June 23, 2015, to correct Figs 3 and 4 in the online version, which were darker than intended. The publisher apologizes for the error. Please view this article again to see the corrected figures.

## Reference

1. Olesen J, Boesgaard T, Iliffe TM (2015) The Unique Dorsal Brood Pouch of Thermosbaenacea (Crustacea, Malacostraca) and Description of an Advanced Developmental Stage of *Tulumella unidens* from the Yucatan Peninsula (Mexico), with a Discussion of Mouth Part Homologies to Other Malacostraca. PLoS ONE 10(4): e0122463. doi:[10.1371/journal.pone.0122463](https://doi.org/10.1371/journal.pone.0122463) PMID: [25901753](https://pubmed.ncbi.nlm.nih.gov/25901753/)

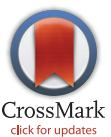

## OPEN ACCESS

**Citation:** The PLOS ONE Staff (2015) Correction: The Unique Dorsal Brood Pouch of Thermosbaenacea (Crustacea, Malacostraca) and Description of an Advanced Developmental Stage of *Tulumella unidens* from the Yucatan Peninsula (Mexico), with a Discussion of Mouth Part Homologies to Other Malacostraca. PLoS ONE 10(7): e0133109. doi:[10.1371/journal.pone.0133109](https://doi.org/10.1371/journal.pone.0133109)

**Published:** July 15, 2015

**Copyright:** © 2015 The PLOS ONE Staff. This is an open access article distributed under the terms of the [Creative Commons Attribution License](https://creativecommons.org/licenses/by/4.0/), which permits unrestricted use, distribution, and reproduction in any medium, provided the original author and source are credited.
